# Supplementary material for: Flowers of Deceptive Aristolochia microstoma Are Pollinated by Phorid Flies and Emit Volatiles Known From Invertebrate Carrion
Source: Frontiers journal article supplement (doi:10.3389/fevo.2021.658441), 2021-05-21
Supplement: Table_1.XLSX [file Table_1.XLSX]

## Sheet: Scent_Data
	Absolute amount of floral scent of Aristolochia microstoma [ng/(h*flower)]. Most samples were collected from female stage flowers, a few also from male stage flowers.
	sexual phase of flower	female	female	female	female	female	female	female	female	female	female	female	female	female	female	female	female	female	female	female	female	female	female	female	male	male	male	male
	site	Egaleo	Egaleo	Egaleo	Egaleo	Egaleo	Egaleo	Egaleo	Arachneo	Arachneo	Arachneo	Arachneo	Arachneo	Arachneo	Arachneo	Arachneo	Arachneo	Arachneo	Methana	Methana	Methana	Methana	Methana	Methana	Egaleo	Arachneo	Methana	Methana
KRI	Compound name
702	unknown (m/z: 45,77,59,81,43,44)	0	0.970318	0	0.869157	0.754888	0	0	14.6696	3.04748	1.53109	0	0	0	0	0	0	0	0	0	0	0	0.361085	0	3.97124	0	2.41201	0
731	3-methyl-1-butanol	1.02423	0.358706	0	0.590939	1.75943	0.77006	1.16965	0	0.226033	0.00697709	0.00697709	0.0631845	0.00675202	0.00634281	0.54496	0.231388	0.589599	0.00523282	0	0.577536	0.343517	0.00697709	0	0.00697709	0	0.408006	0.0984489
746	dimethyldisulfide	64.6419	75.6669	0.457697	29.3232	76.6821	105.843	63.256	30.6442	1.53443	44.4563	3.15637	5.98643	102.397	22.5184	26.3782	18.975	40.8137	40.7134	179.15	3.53299	83.6861	6.7801	16.1695	39.6674	0.00697709	15.0306	2.48953
809	unknown (m/z: 92,45,77,57,47,44)	0	0.0368111	0	0.0769364	0.124241	0.0805764	0.0655136	0.113368	0.0138146	0.089551	0.0172823	0.0202684	0.239805	0.0956305	0.0462372	0.0847856	0.0605053	0.144164	0.430773	0.0501025	0.155652	0.00697709	0.0670289	0.118785	0	0.097463	0.0401619
824	2-methylpyrazine	0.470884	0.135153	0	0	0	0	0.501765	0	0	0	0	0	0	0	0	0.0827483	0.0397206	0.144164	0.103177	0.160885	0.192163	0	0	0	0	0.106736	0
876	3-methylbutyl acetate	1.30257	0	0	0	0	0	0	0	0	0	0	0	0	0	0	0	0	0	0	0	0.214615	0	0	0	0	0	0
912	2,5-dimethylpyrazine	14.8938	4.84489	2.20664	1.11475	2.56202	0.427107	6.0114	11.4364	6.77595	15.1378	10.1609	1.55609	32.9817	18.4356	3.78092	11.4874	23.6255	51.4725	38.0303	21.7841	53.1084	15.1826	9.34661	0.711349	0.828739	15.758	32.3723
979	dimethyltrisulfide	1.00917	3.76508	0	0.403004	3.54717	0.00575135	5.28565	2.11177	2.17504	3.75326	1.33855	1.08215	2.12327	4.75417	1.52369	1.40146	4.503	3.62819	5.60271	1.01697	6.81834	0.915722	0.00697709	0.856919	0	2.45934	0.569592
1048	unknown (m/z: 121,108,136,135,69,83)	0	0	0	0	0	0	0	1.35687	0	0.78989	0	0.23457	0.00675202	0.855823	0	0	0.00697709	0.189255	0	0.204785	0	0.180393	0.00697709	0	0	0	0.0628854
1068	unknown (m/z: 47,126,63,79,64,46)	0.00697709	0.188395	0	0	0.149213	0.00575135	0.00575135	0.653741	0.756302	0.383398	0.698051	0.777262	1.36246	0.224459	1.33936	1.04471	1.05362	0.119643	1.0539	0.369535	0.00697709	0.122888	0.00697709	0.0439208	0	1.24473	0.0544802
1133	unknown (m/z: 122,121,135,108,150,39)	0	0	0	0	0	0	0.00575135	0.00721768	0	2.83068	0	0.0263246	0	2.50554	0	0	0.0538003	0	0	0.336742	0.00697709	0.348234	0.00697709	0	0.00697709	0	0.00654102
1139	unknown (m/z: 61,43,138,95,123,85)	0	0.167946	0	0	0.115838	0.00575135	0.0798517	0.104447	0.00615626	0.00697709	0.00697709	0	0.227125	0.00634281	0.171211	0.094728	0.211245	0.0876235	0.23713	0.0317527	0.0918604	0.00697709	0.260225	0	0	0.00697709	0
1140	2-isobutyl-3-methylpyrazine	0	0	0.208001	0	0	1.28713	0	0	0	14.9055	0.0652567	0.748426	0	16.0046	0	0	0	0	0	0	0	0.0349552	0.00697709	0	0.272504	0	0
1233	β-cyclocitral	0.528291	0.00697709	0	0	0	0	3.15168	0	0	0	0.0843181	0.00697709	0.00675202	0	0	0	0.130583	0	0	0.00697709	0.687676	0.137191	0	0	0	0.2859	0
1283	unknown (m/z: 79,108,93,99,127,155)	0	0	0	0	0	0	0.895479	0	0	0	0	0	0	0	0	0	0	0	0	0	0	0	0	0	0	0	0
1598	methyl-3,4-dimethoxybenzoate	0.367148	0.151891	0	0.057261	0.228645	0.441669	0	1.17603	0.279316	0.241986	0.139653	0	0.00675202	0.376484	0.538276	0.12773	0	0.226722	1.18897	0.286884	0	0	0	0	0	0.968274	0.663705
	Total amount	84.2449	86.2931	2.87234	32.4352	85.9236	108.867	80.4285	62.2736	14.8145	84.1333	15.6744	10.5017	139.358	65.7834	34.3229	33.53	71.0882	96.7309	225.797	28.3592	145.312	24.0841	25.8783	45.3765	1.1152	38.778	36.3576
